# Supplementary material for: Producing a dual-fluorescent molecule by tuning the energetics of excited-state intramolecular proton transfer
Source: Royal Society of Chemistry journal article supplement (doi:10.1039/c5pp00088b), 2015-07-22

## Targetting production of a dual-fluorescent molecule by tuning the energetics of excited-state intramolecular proton transfer

Satomi Tasaki, Atsuya Momotake, Yoko Kanna, Tomoo Sato, Yoshinobu Nishimura, Tatsuo Arai

### Supporting Information

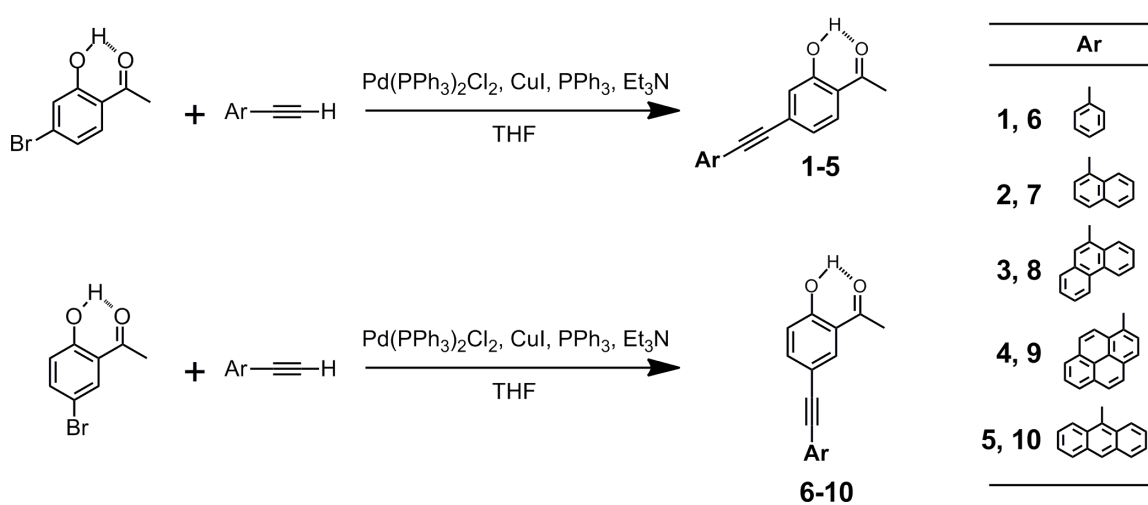

Scheme S1

<sup>1</sup>H NMR of compound 1

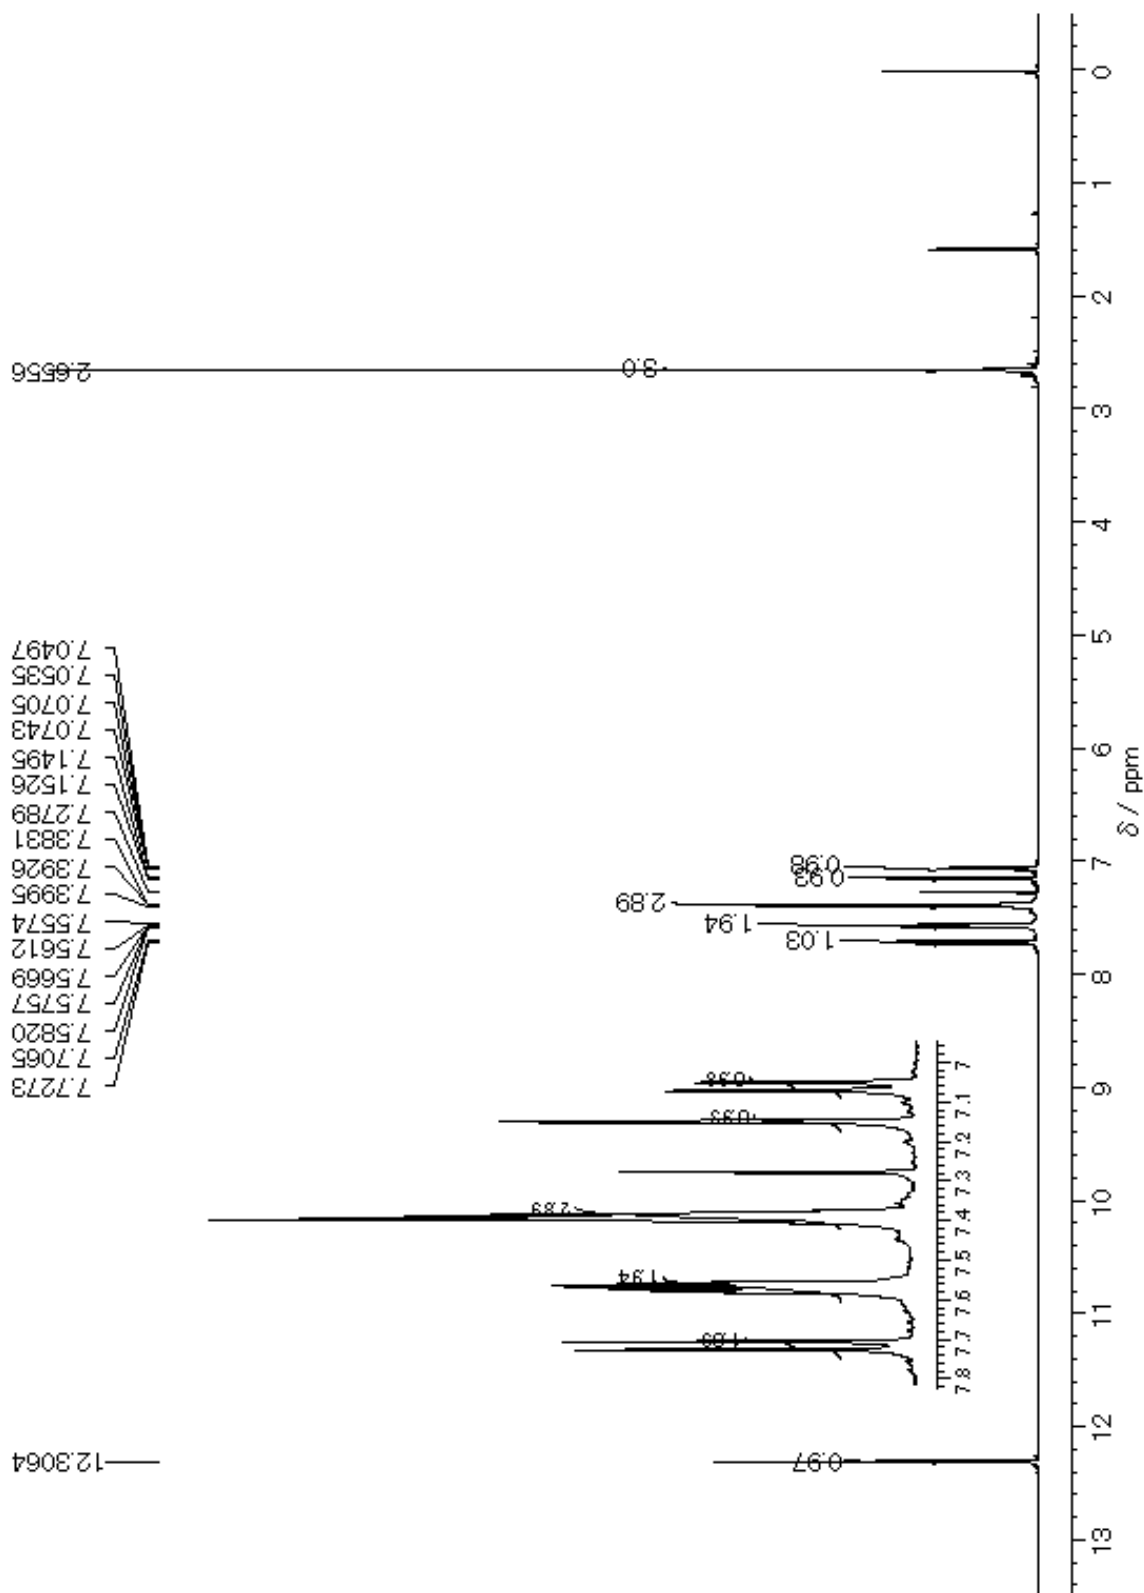

$^{13}\text{C}$  NMR of compound 1

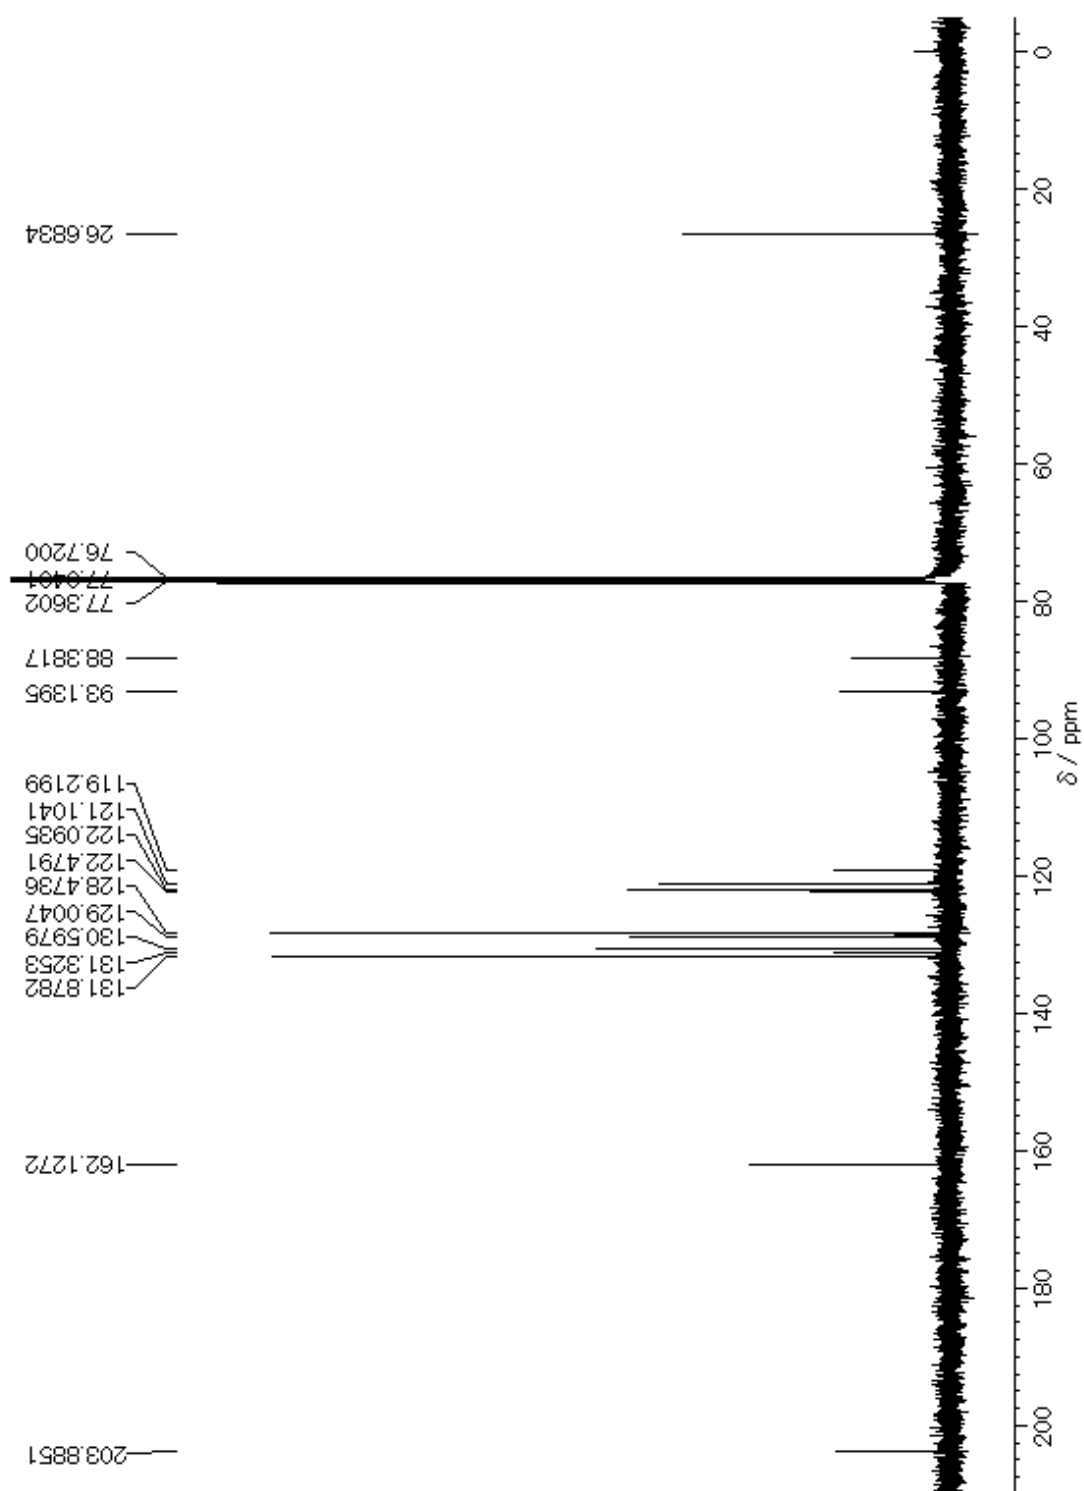

<sup>1</sup>H NMR of compound 2

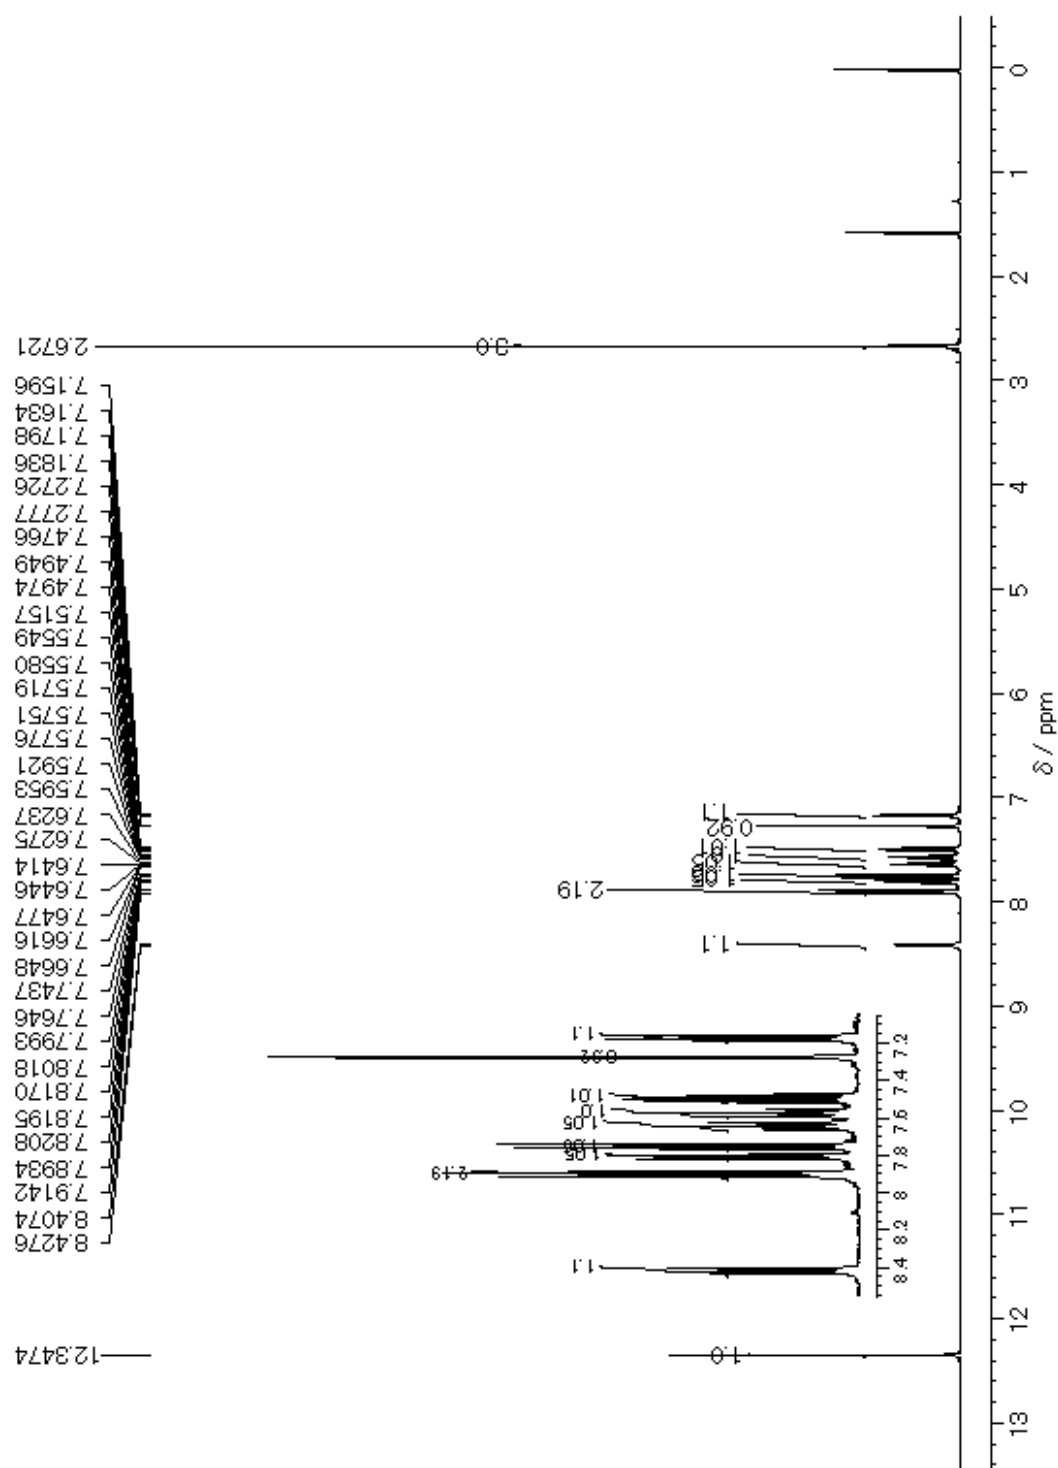

$^{13}\text{C}$  NMR of compound **2**

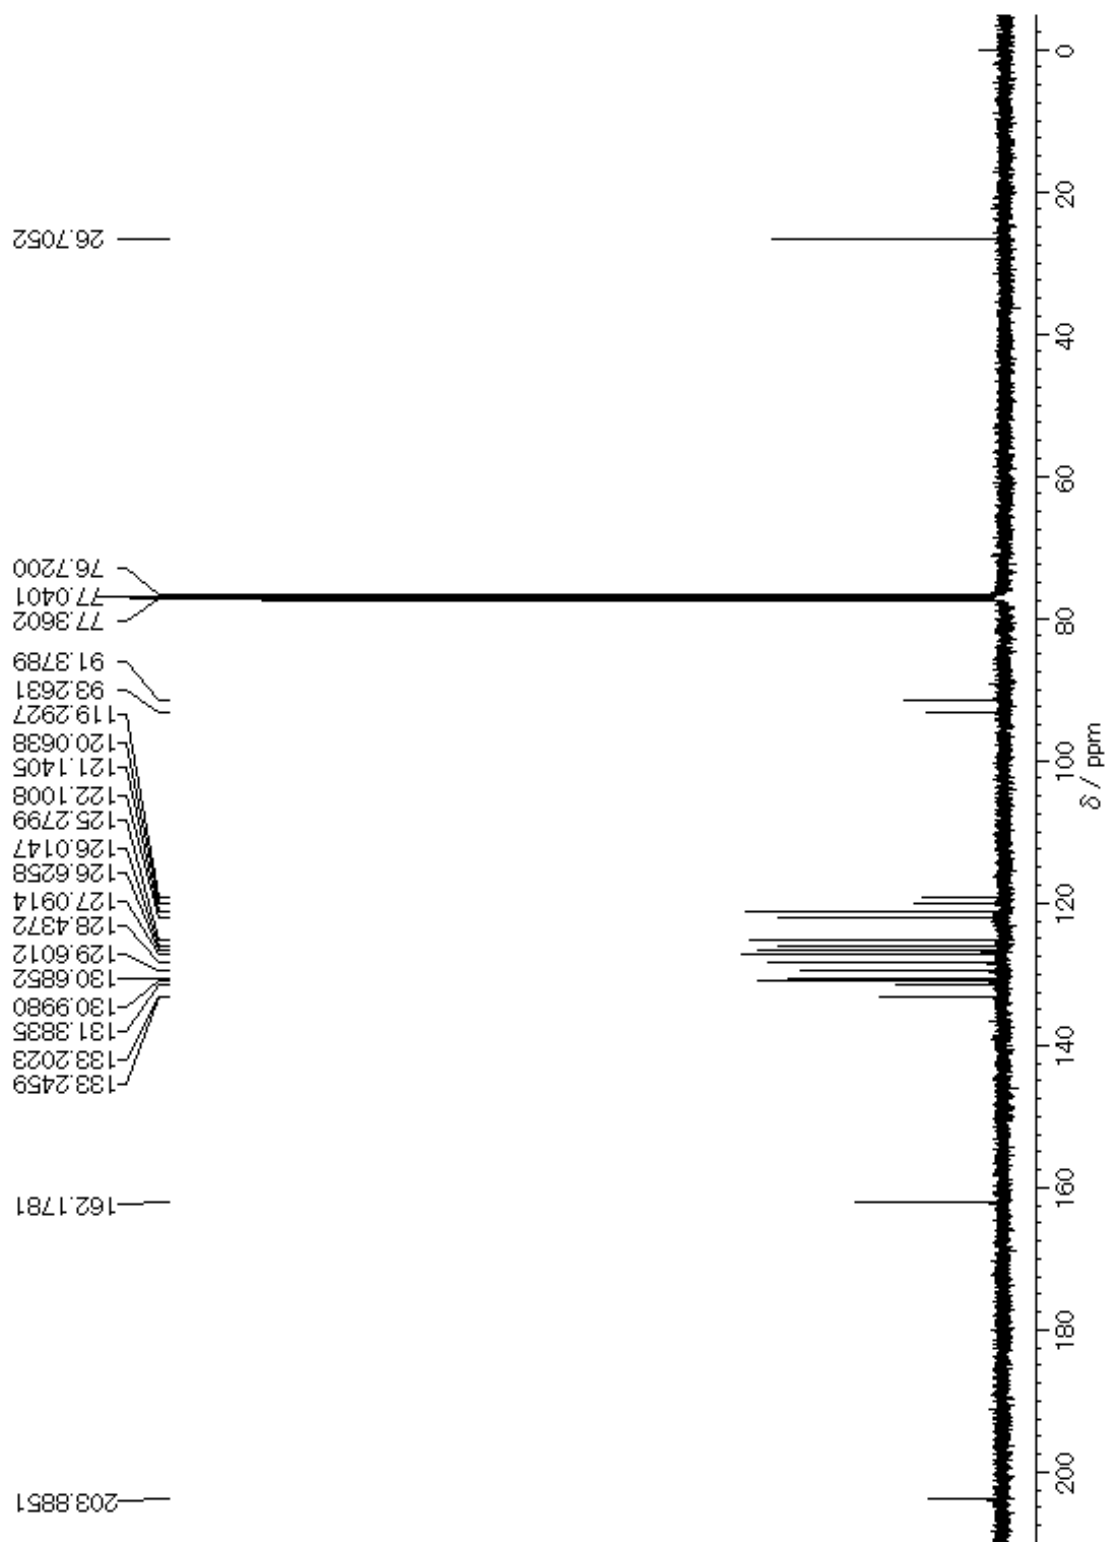

<sup>1</sup>H NMR of compound 3

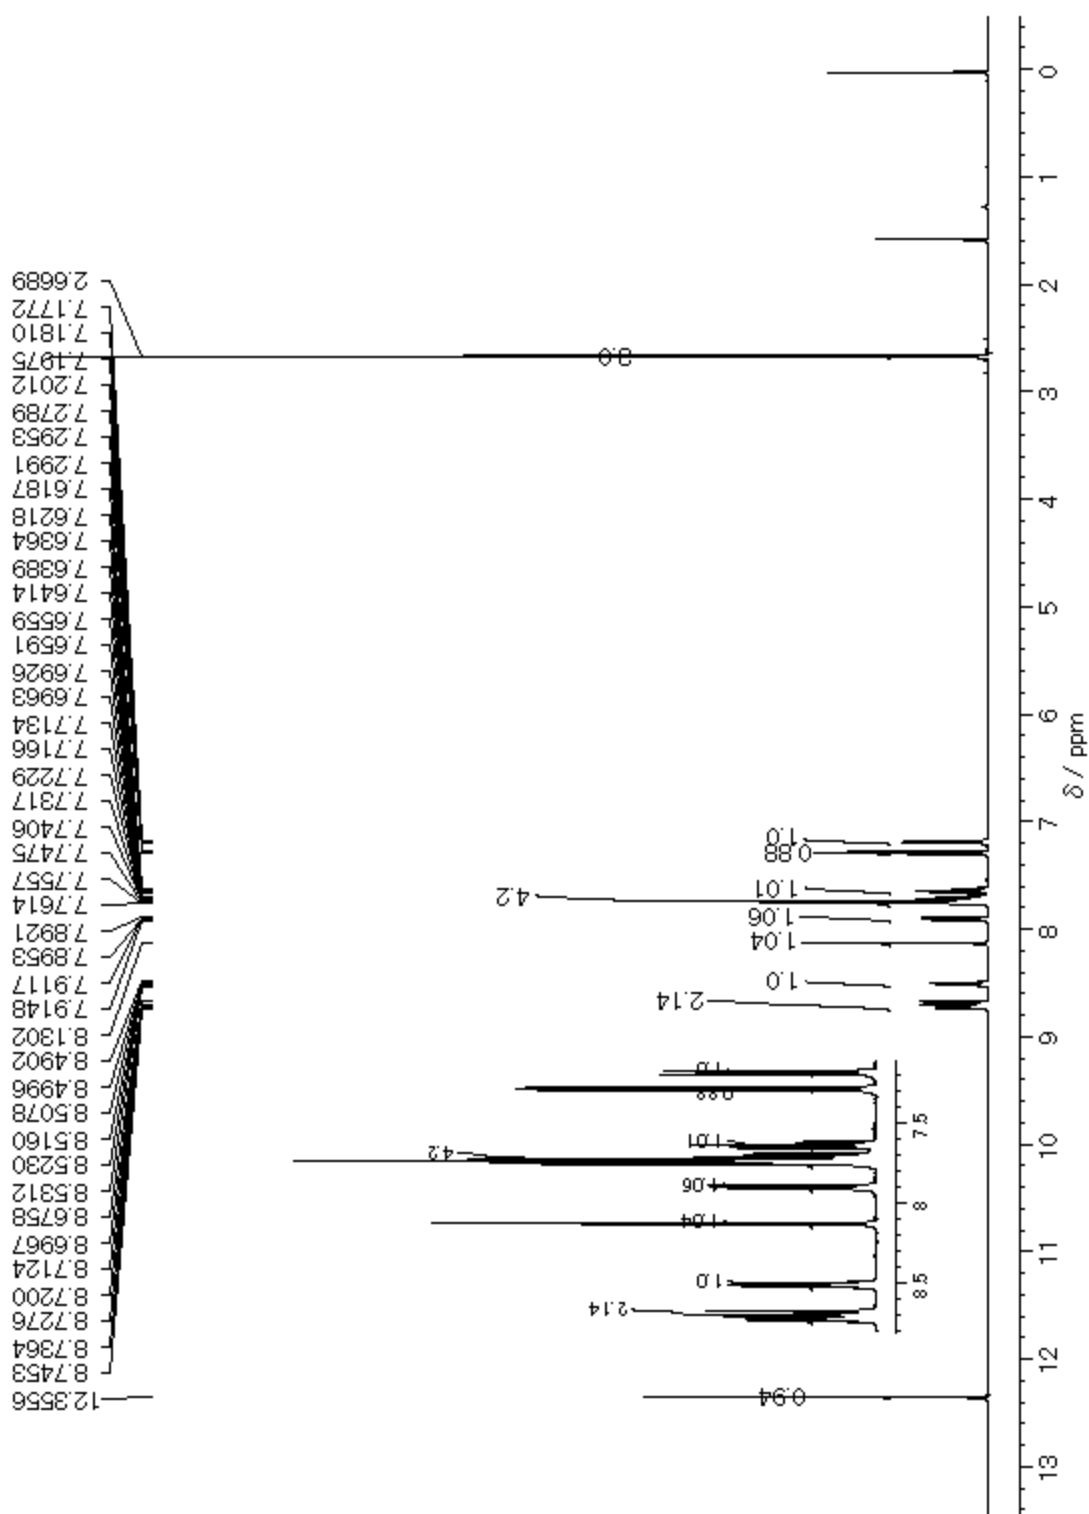

<sup>13</sup>C NMR of compound 3

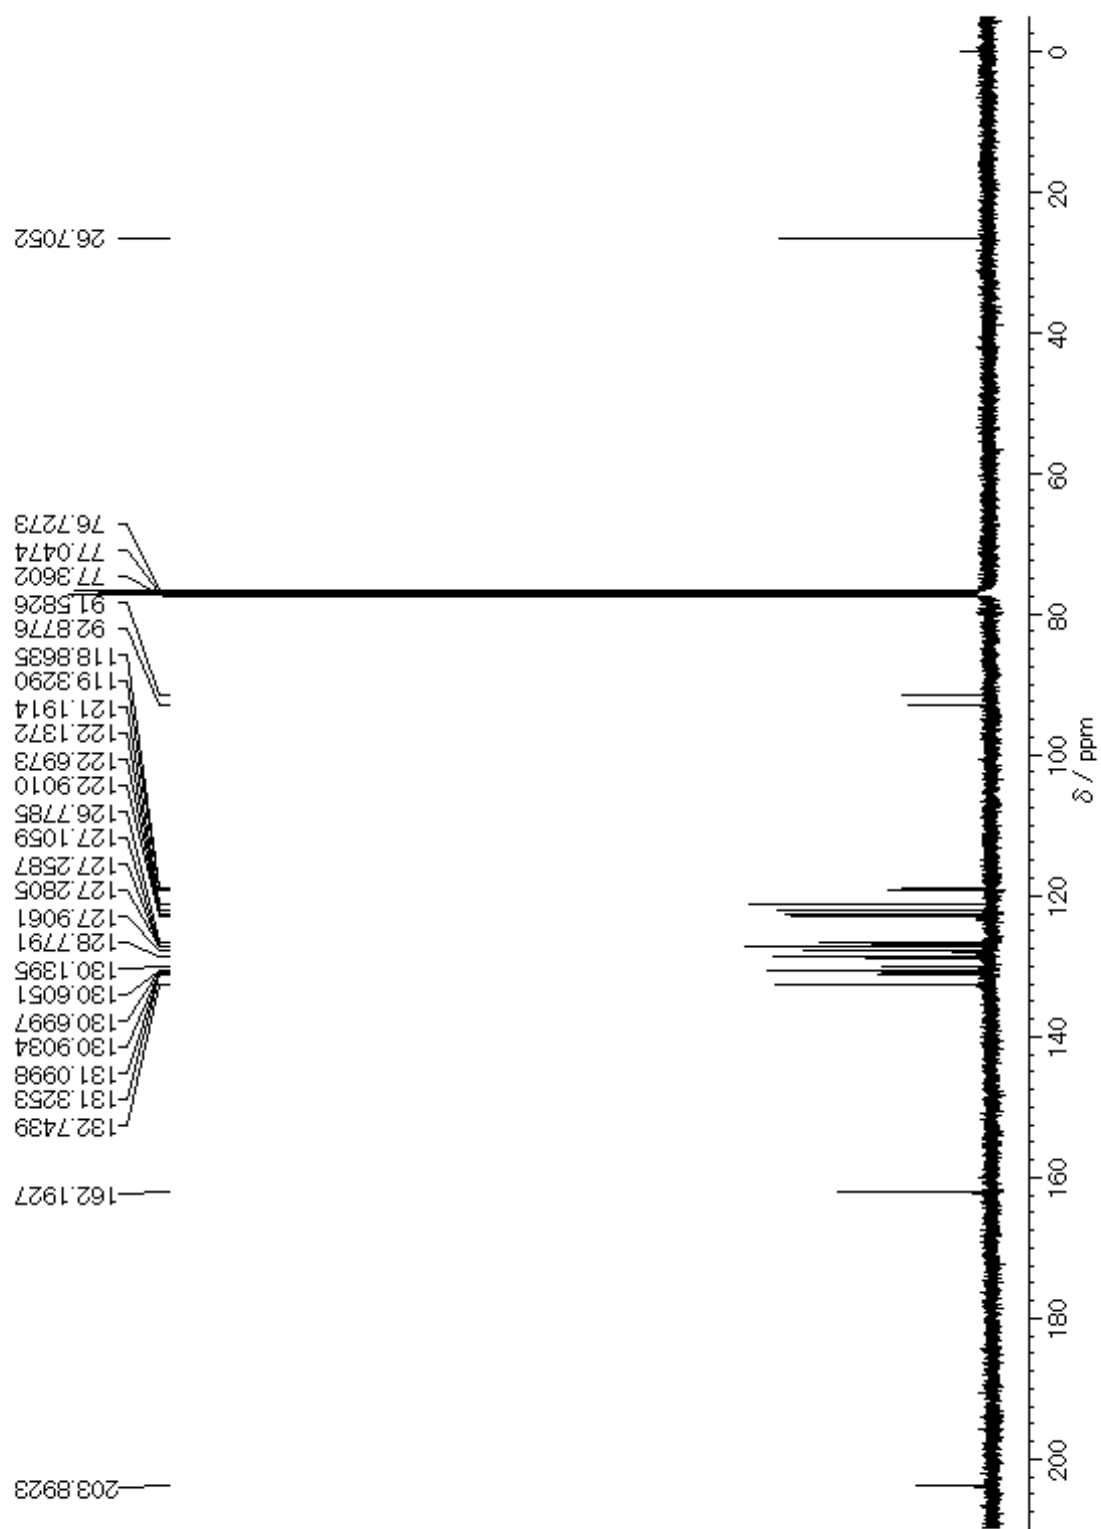

<sup>1</sup>H NMR of compound 4

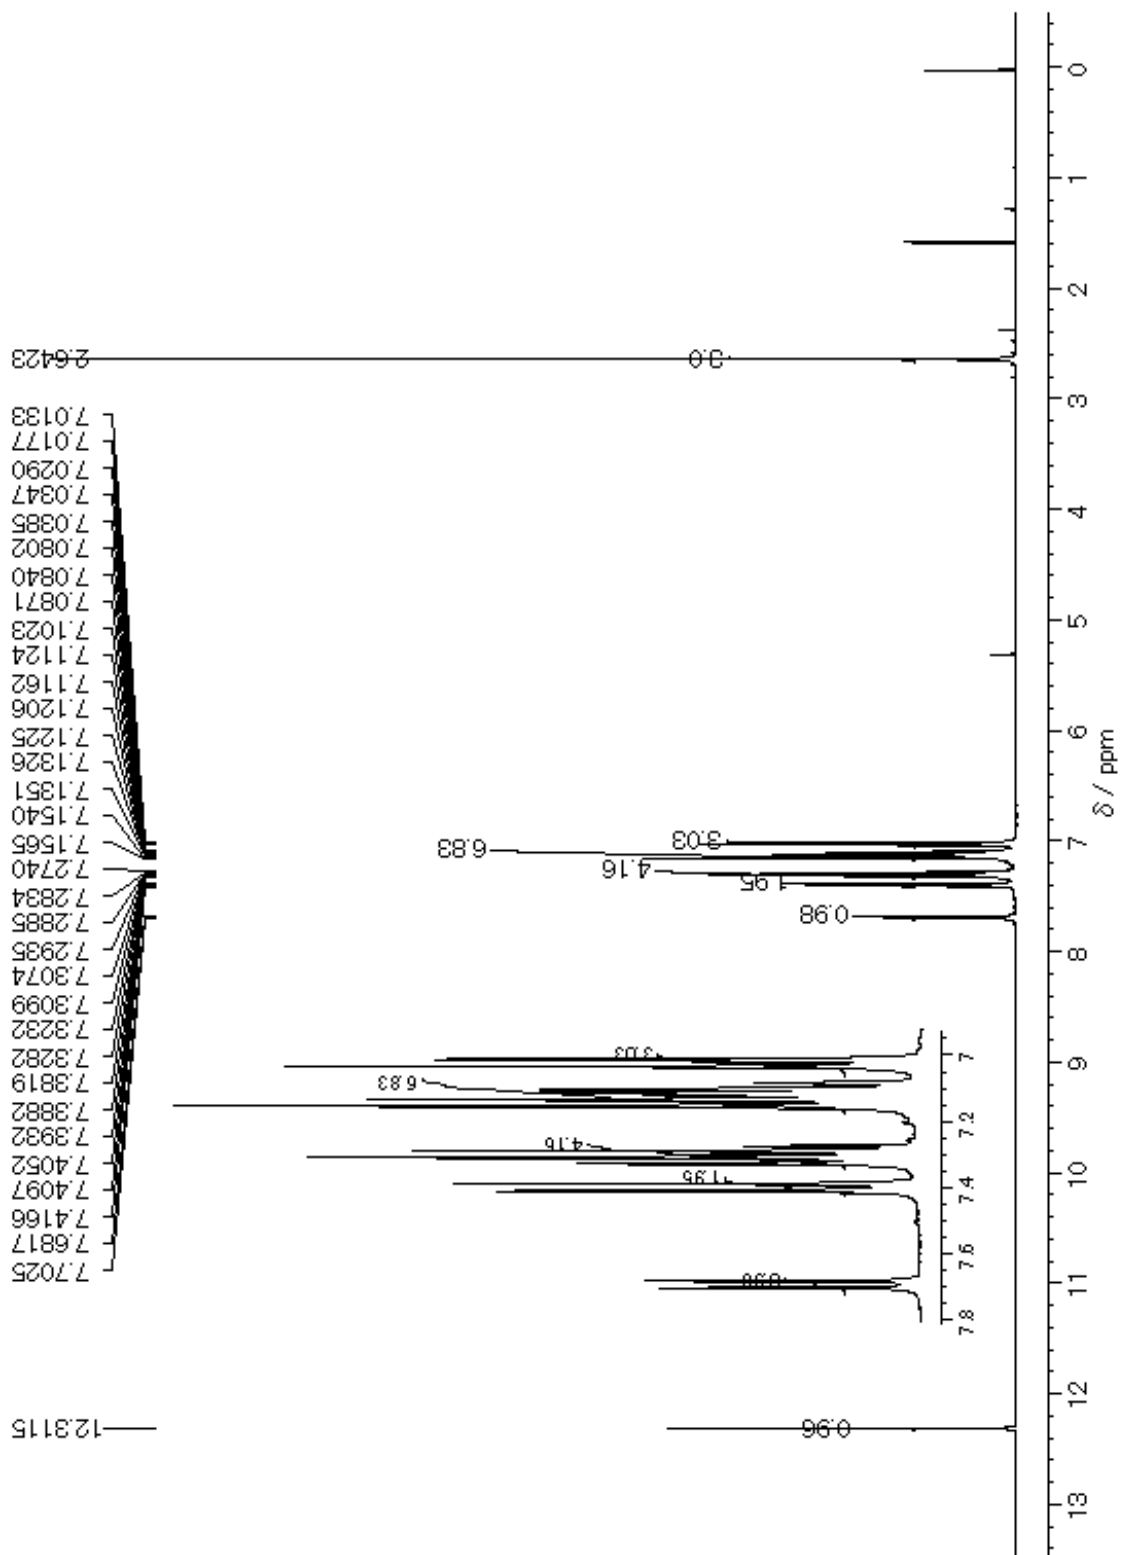



<sup>13</sup>C NMR of compound 4

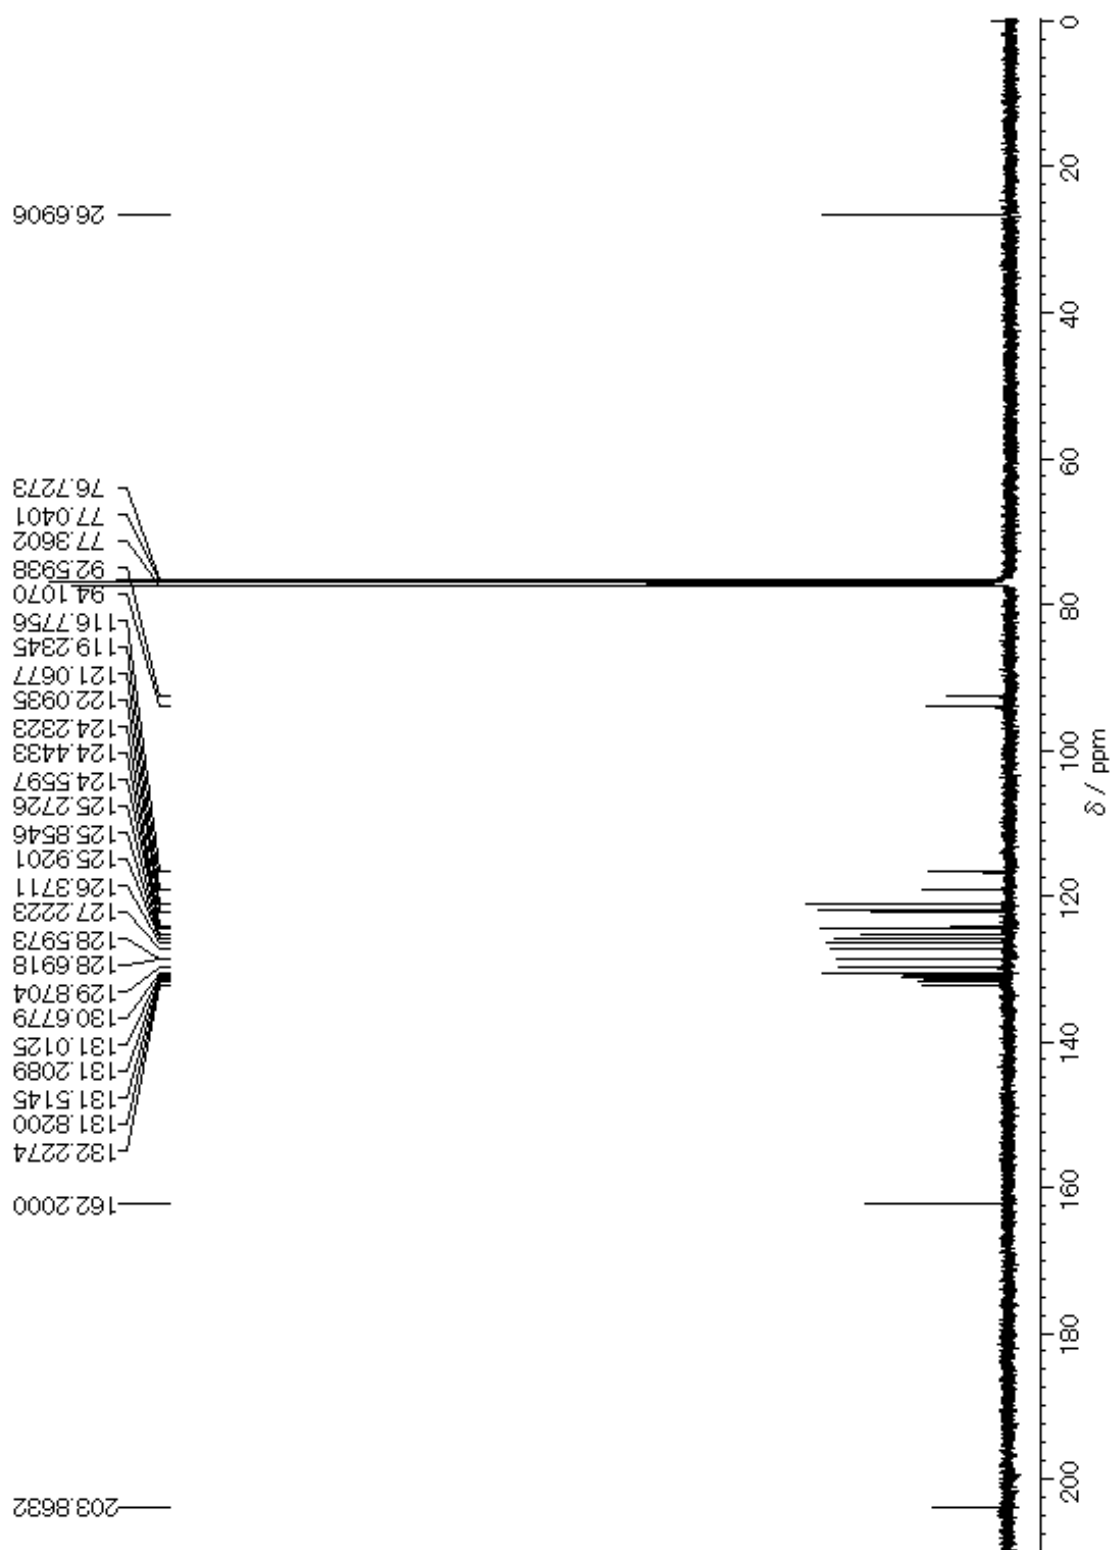

<sup>1</sup>H NMR of compound 5

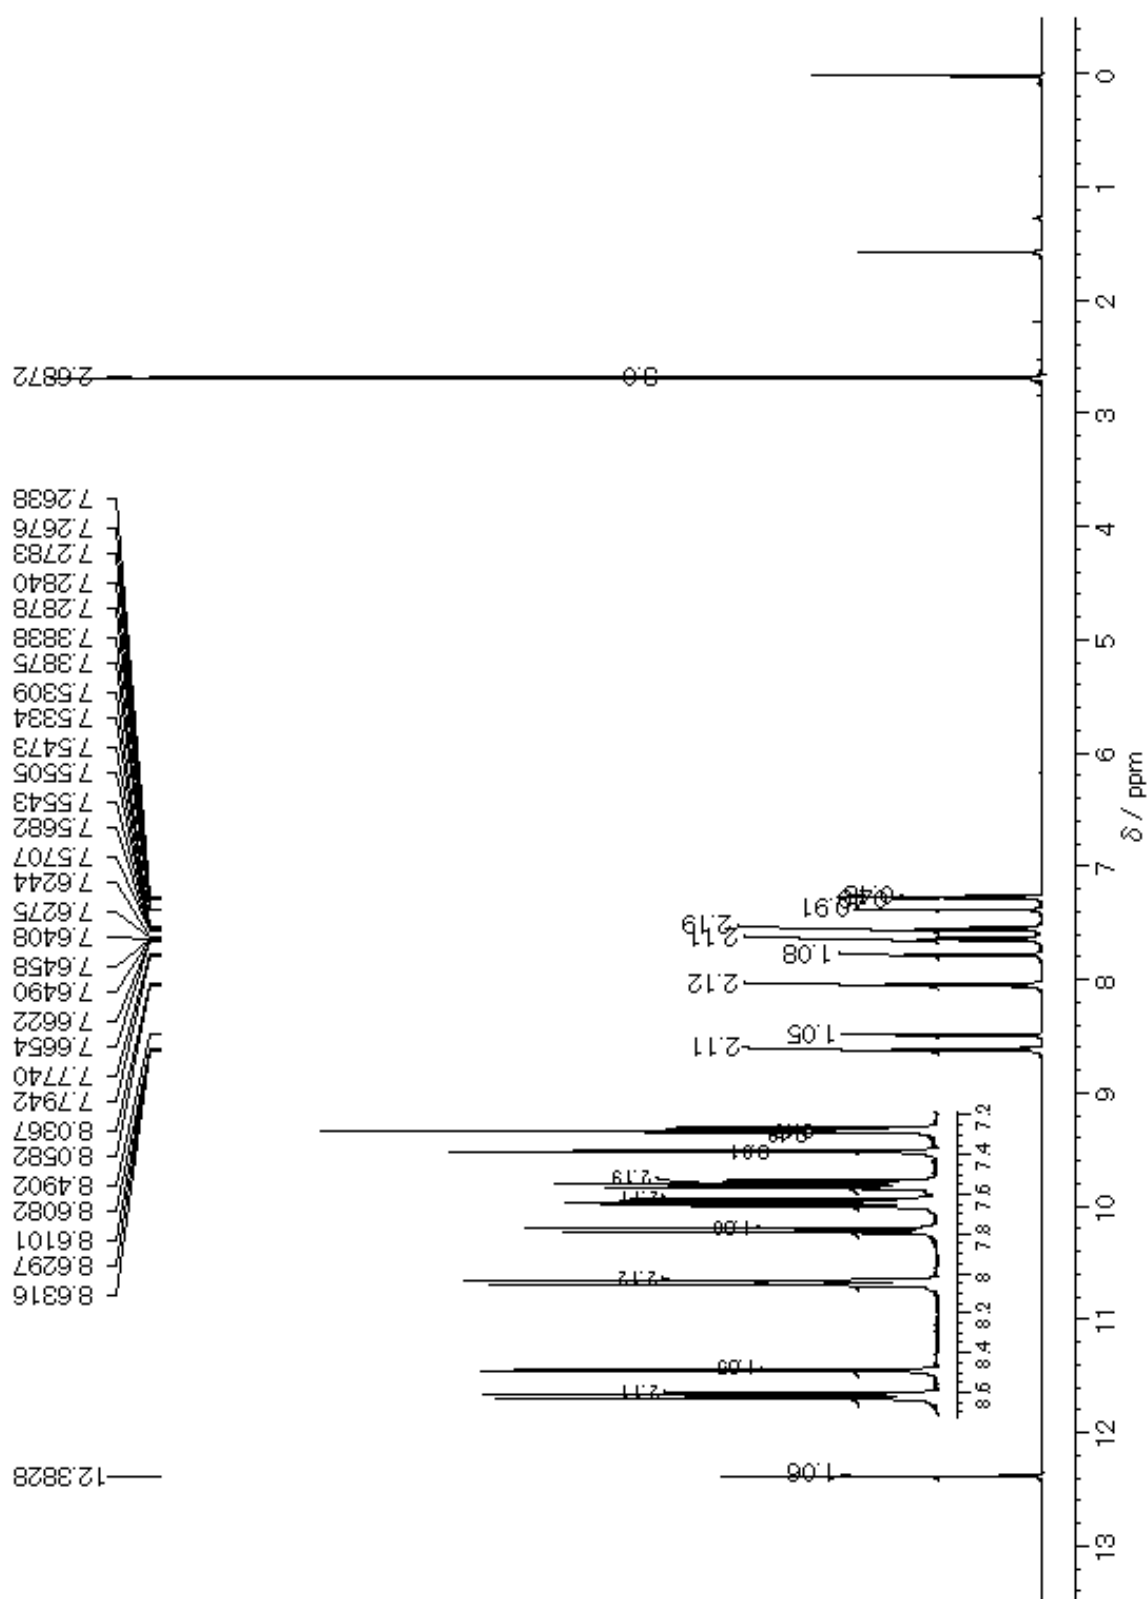

<sup>13</sup>C NMR of compound 5

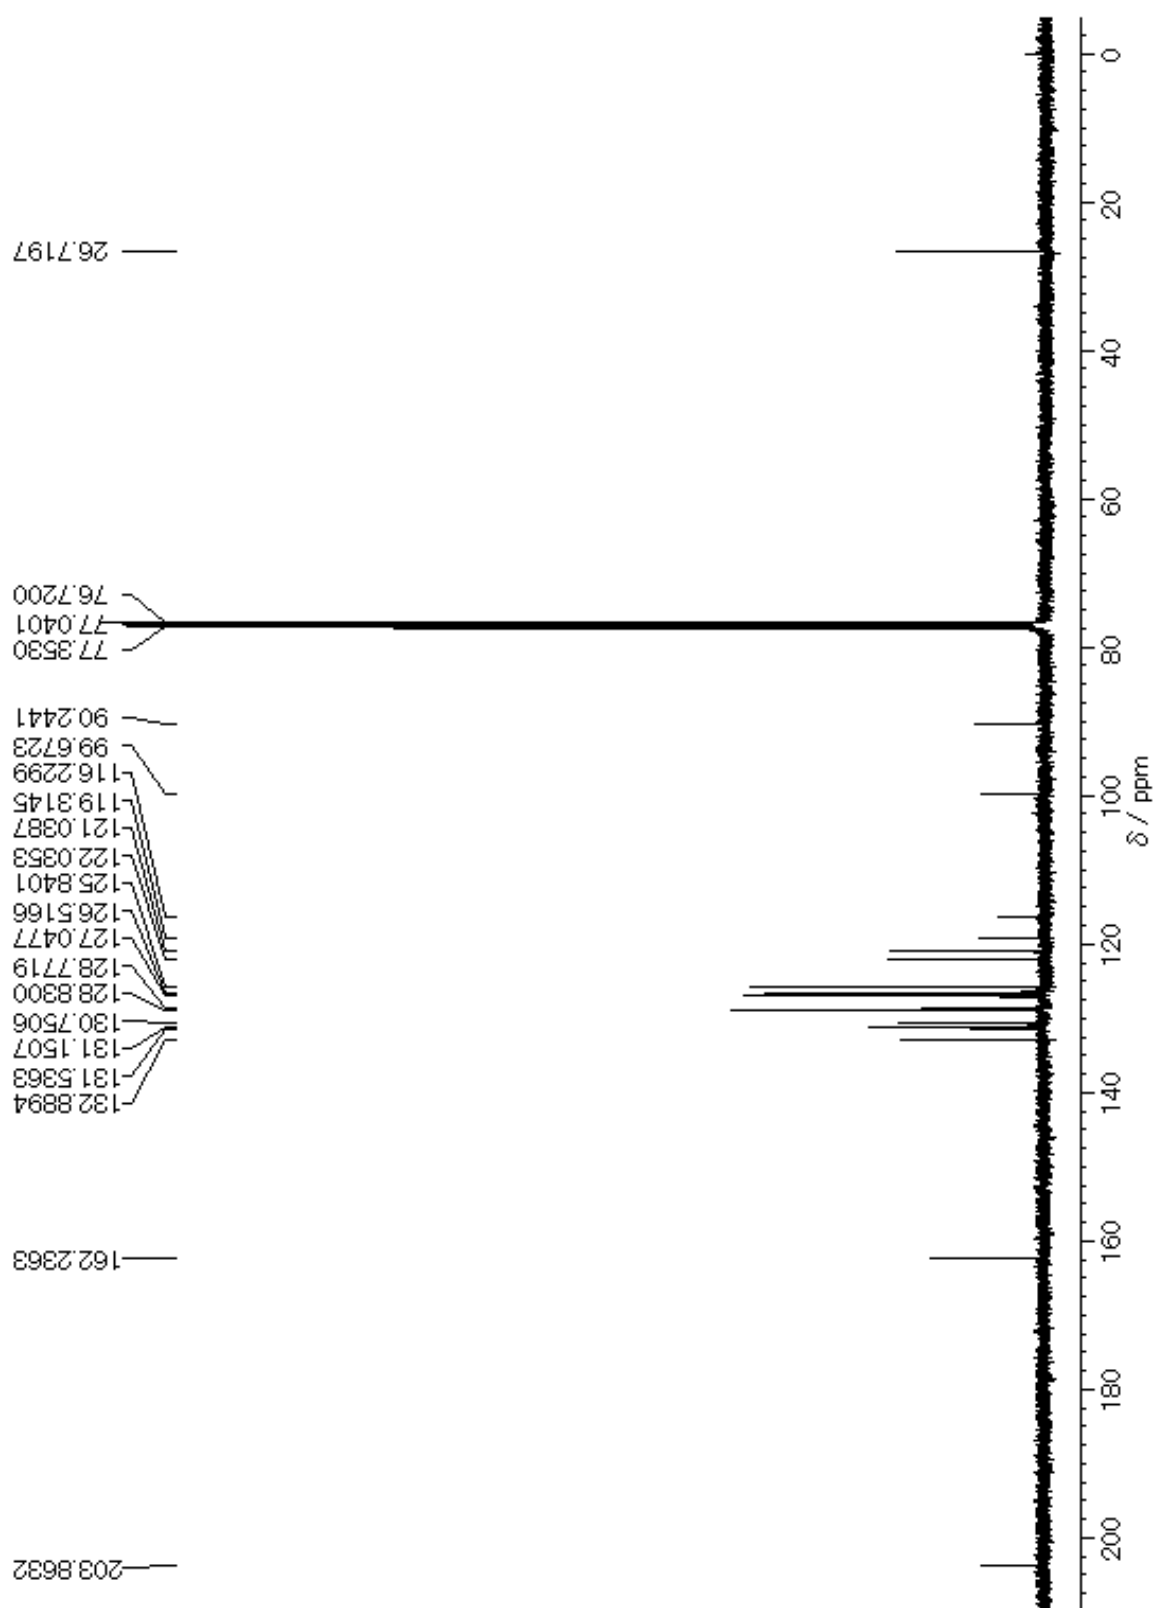

$^1\text{H}$  NMR of compound **6**

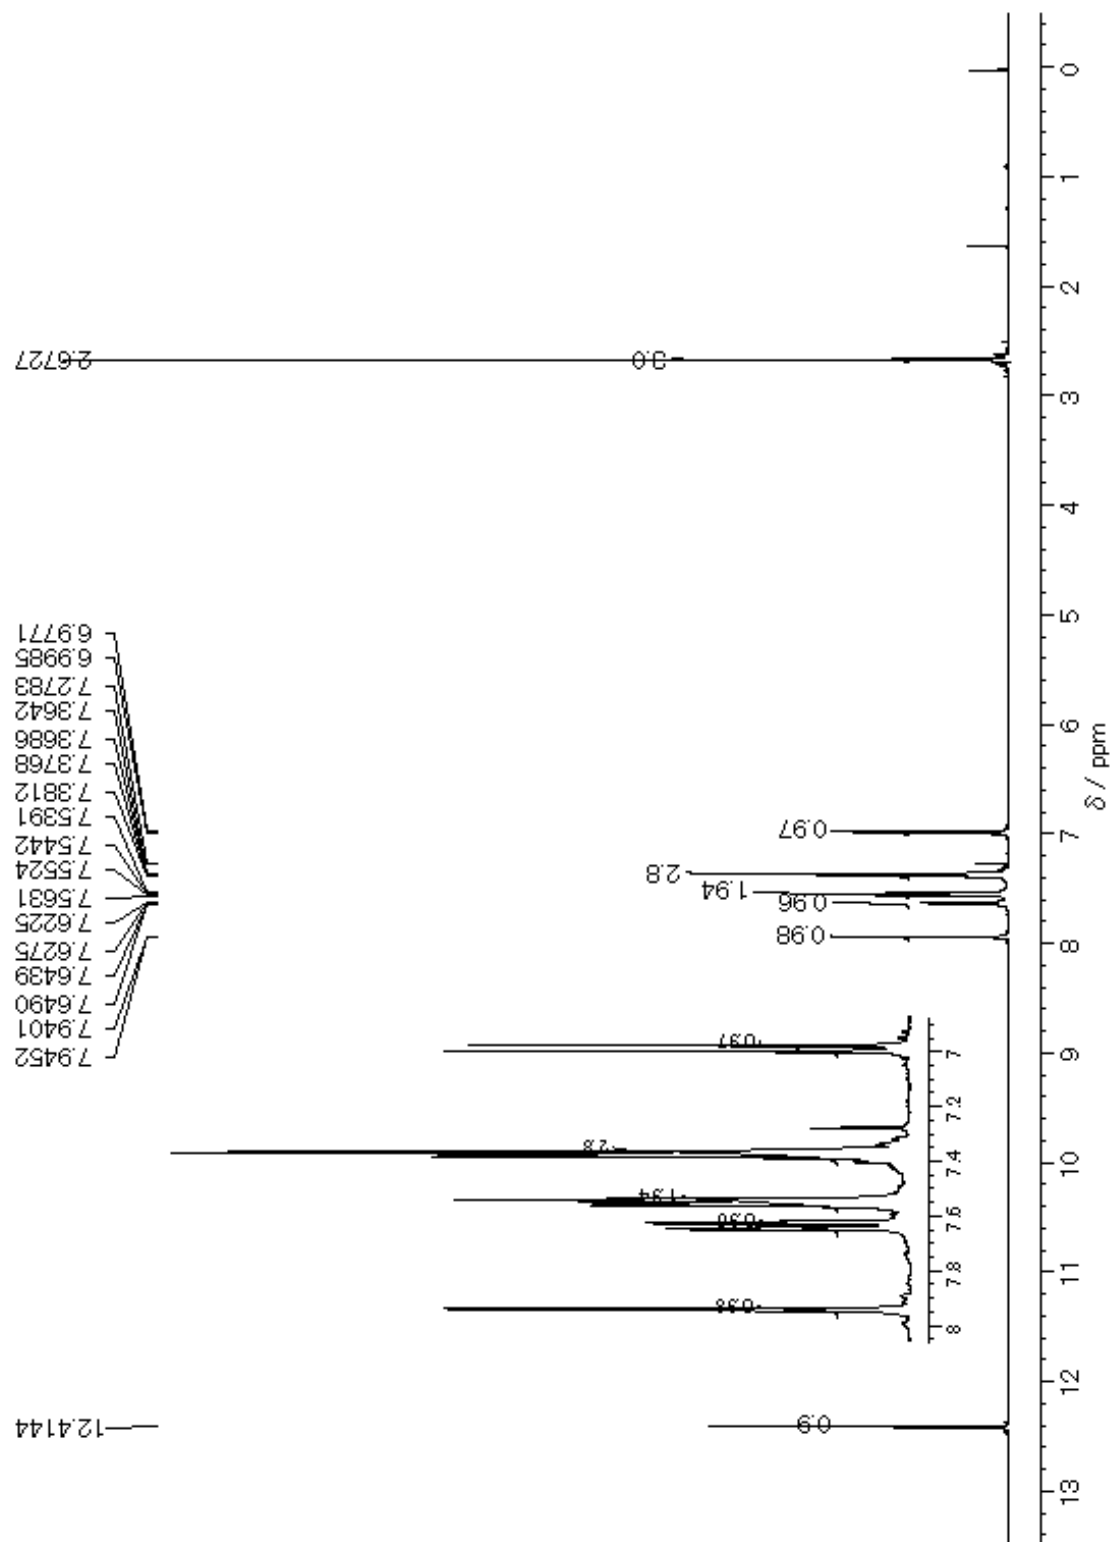

<sup>13</sup>C NMR of compound 6

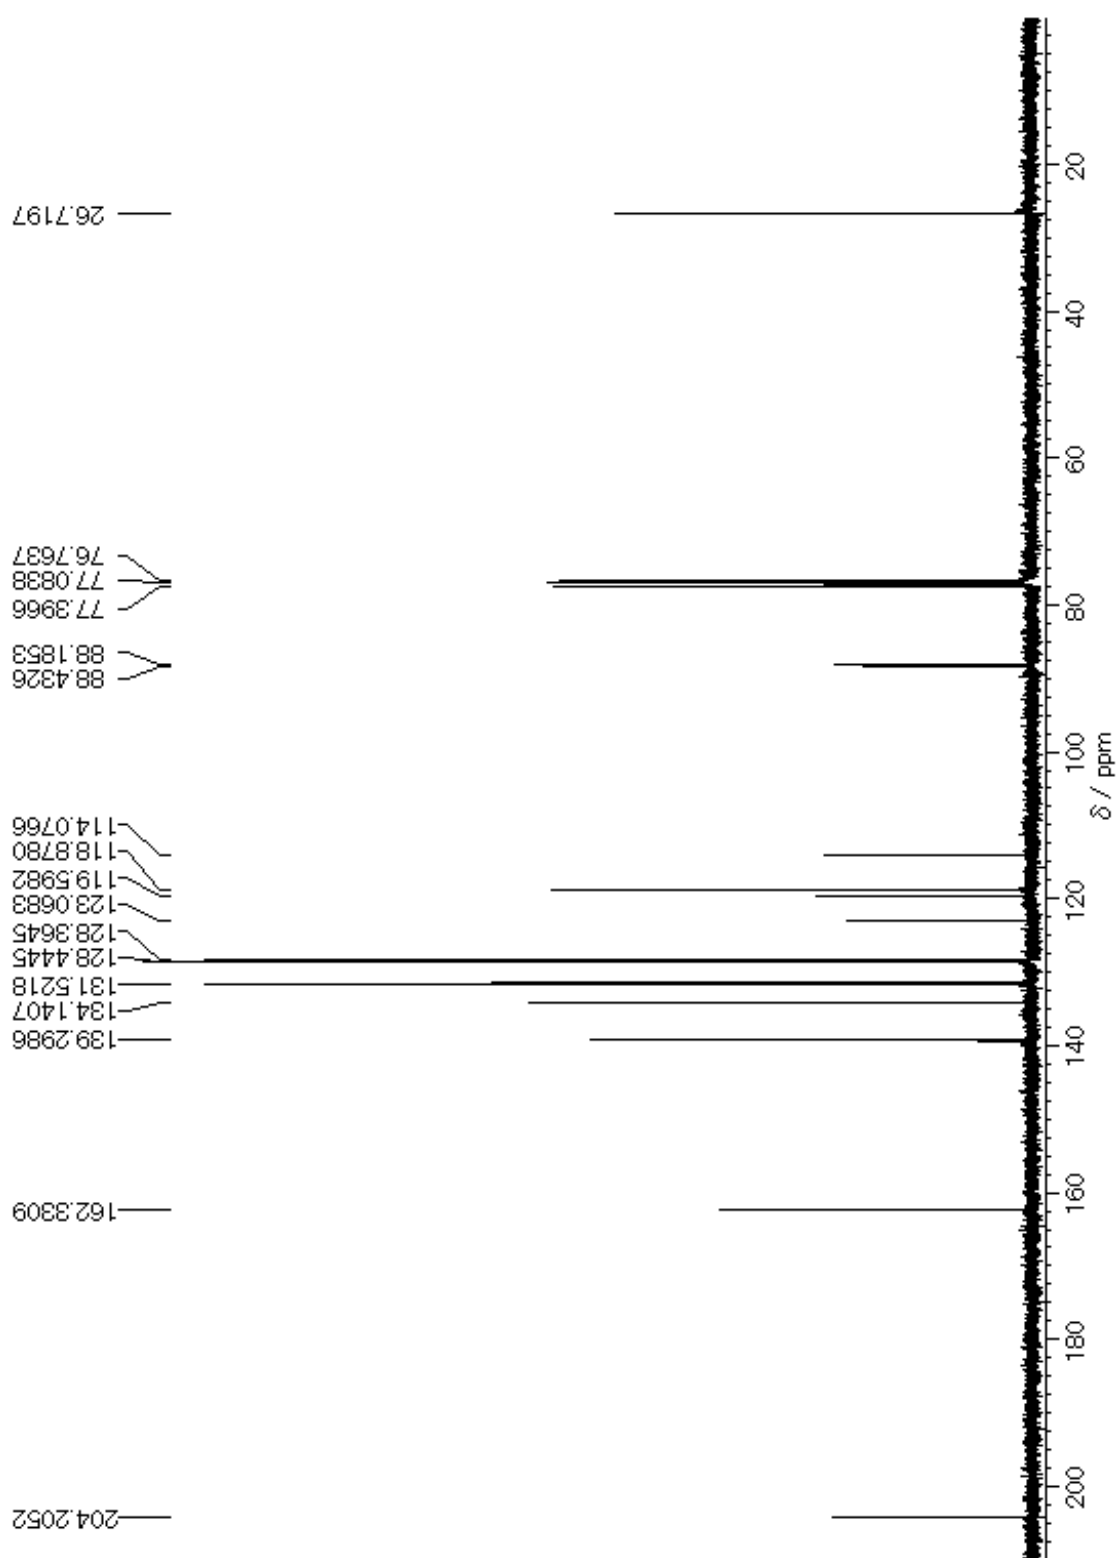

$^1\text{H}$  NMR of compound 7

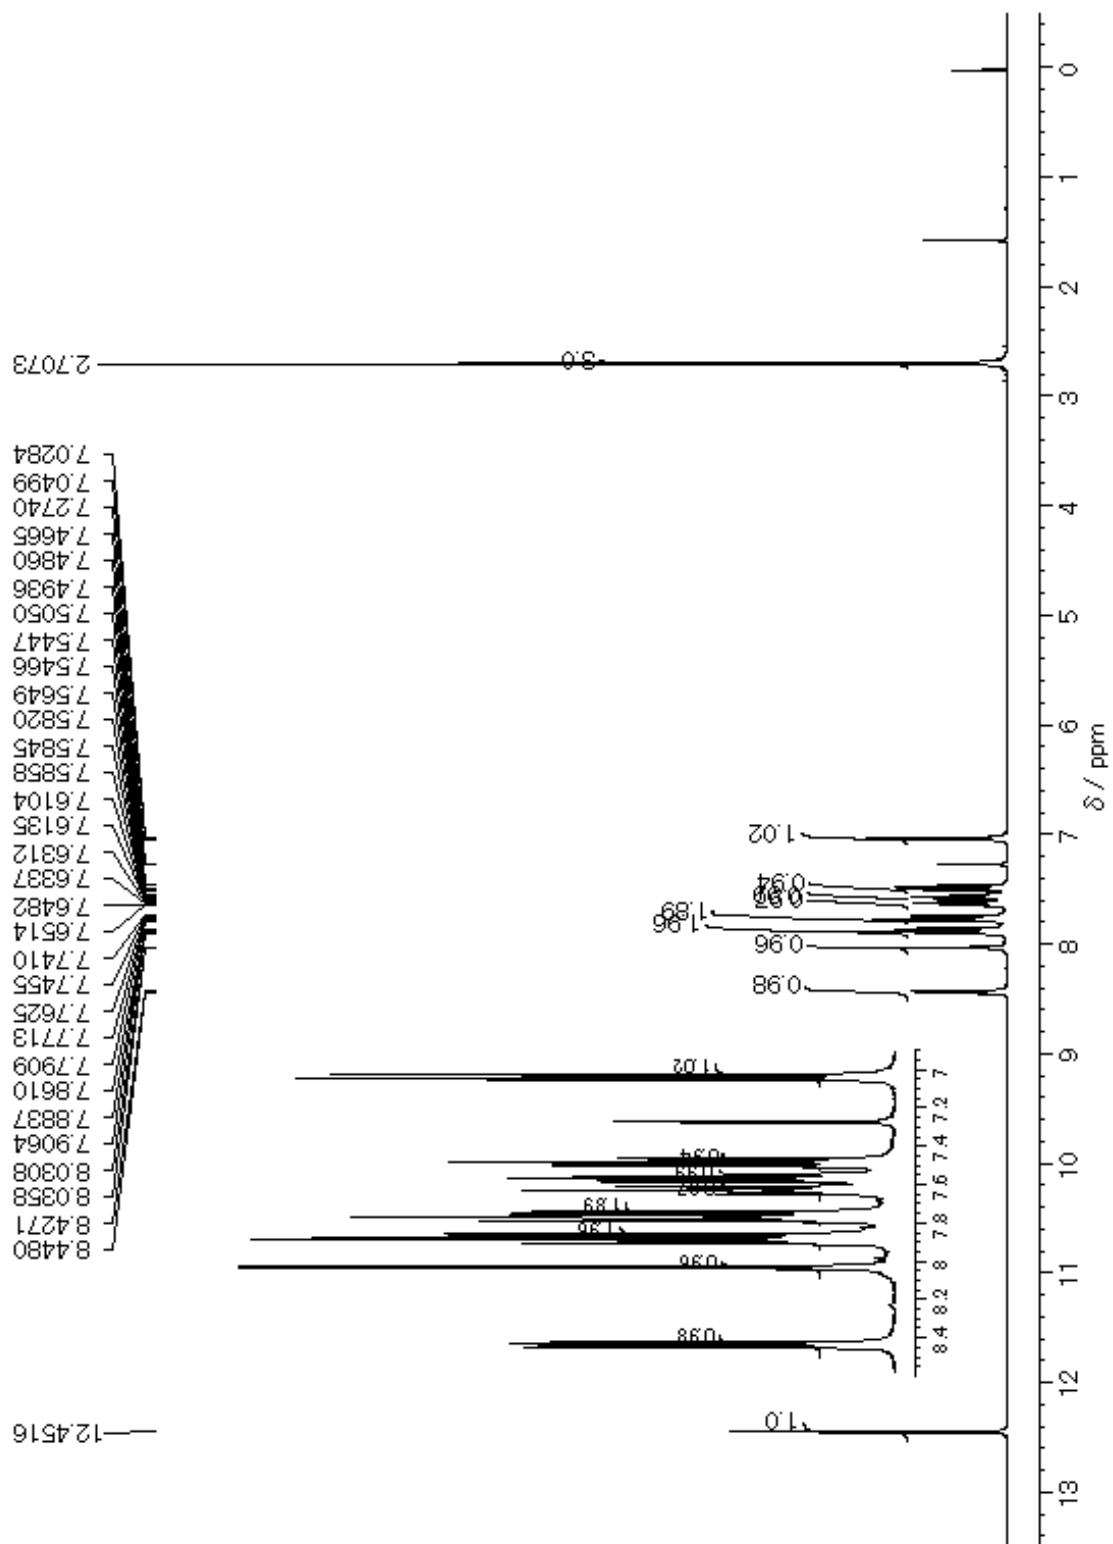

$^{13}\text{C}$  NMR of compound 7

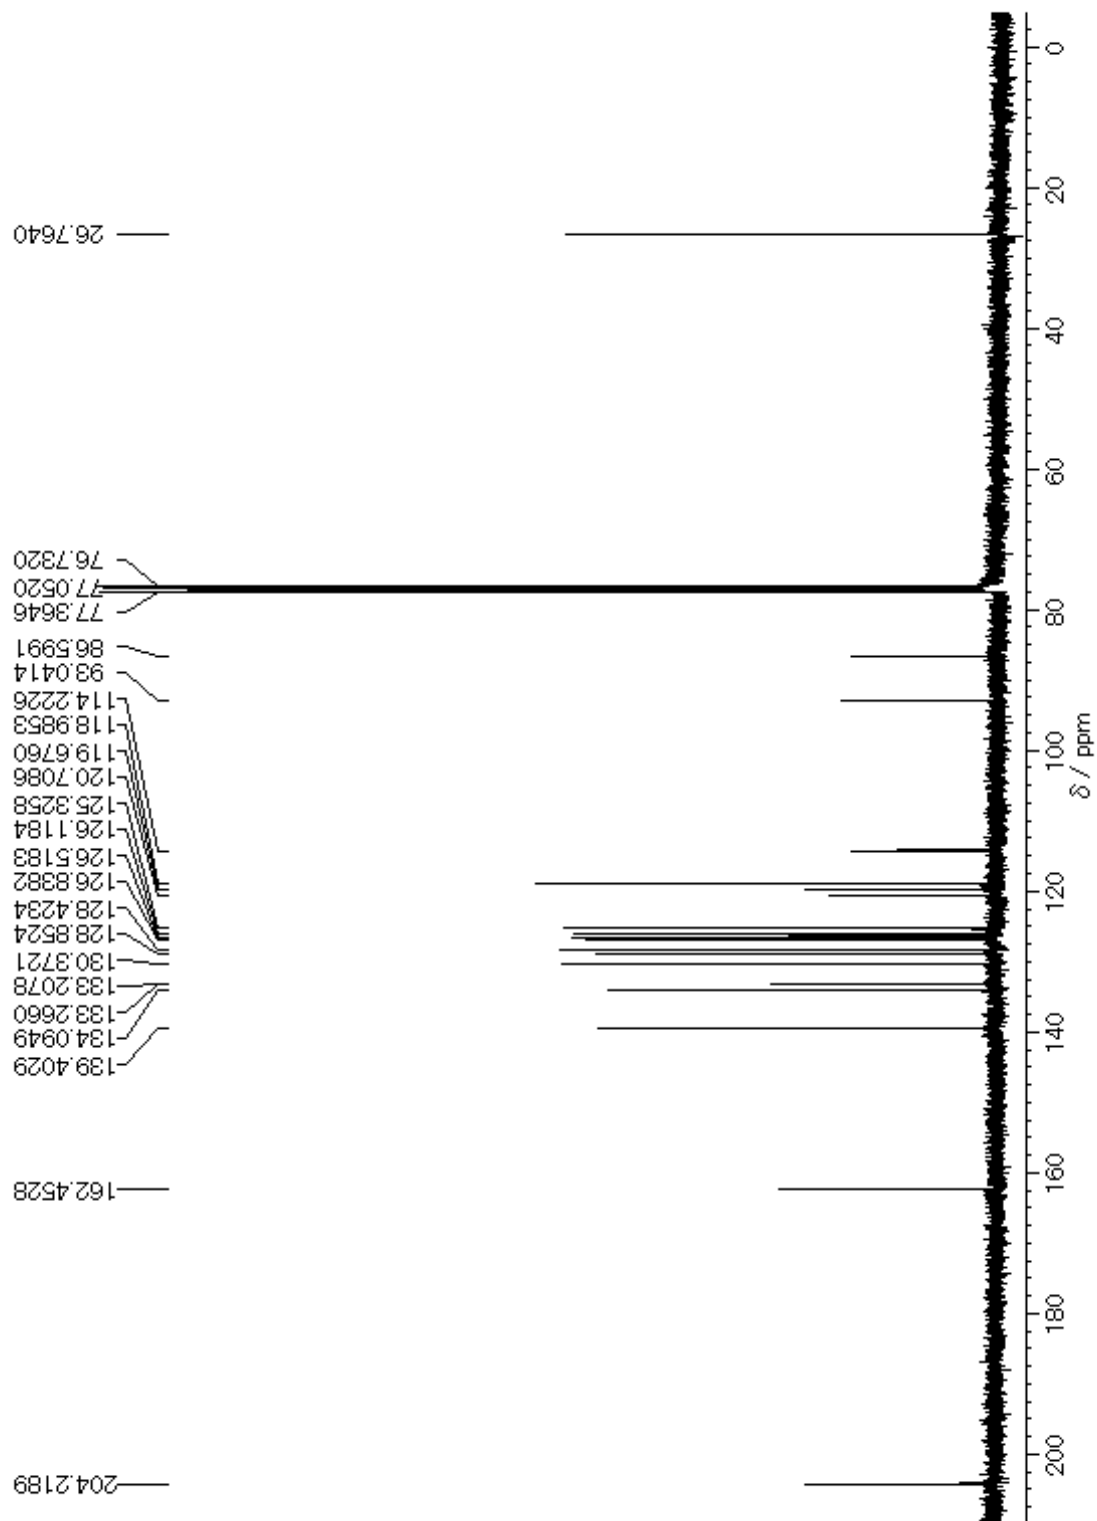

$^1\text{H}$  NMR of compound **8**

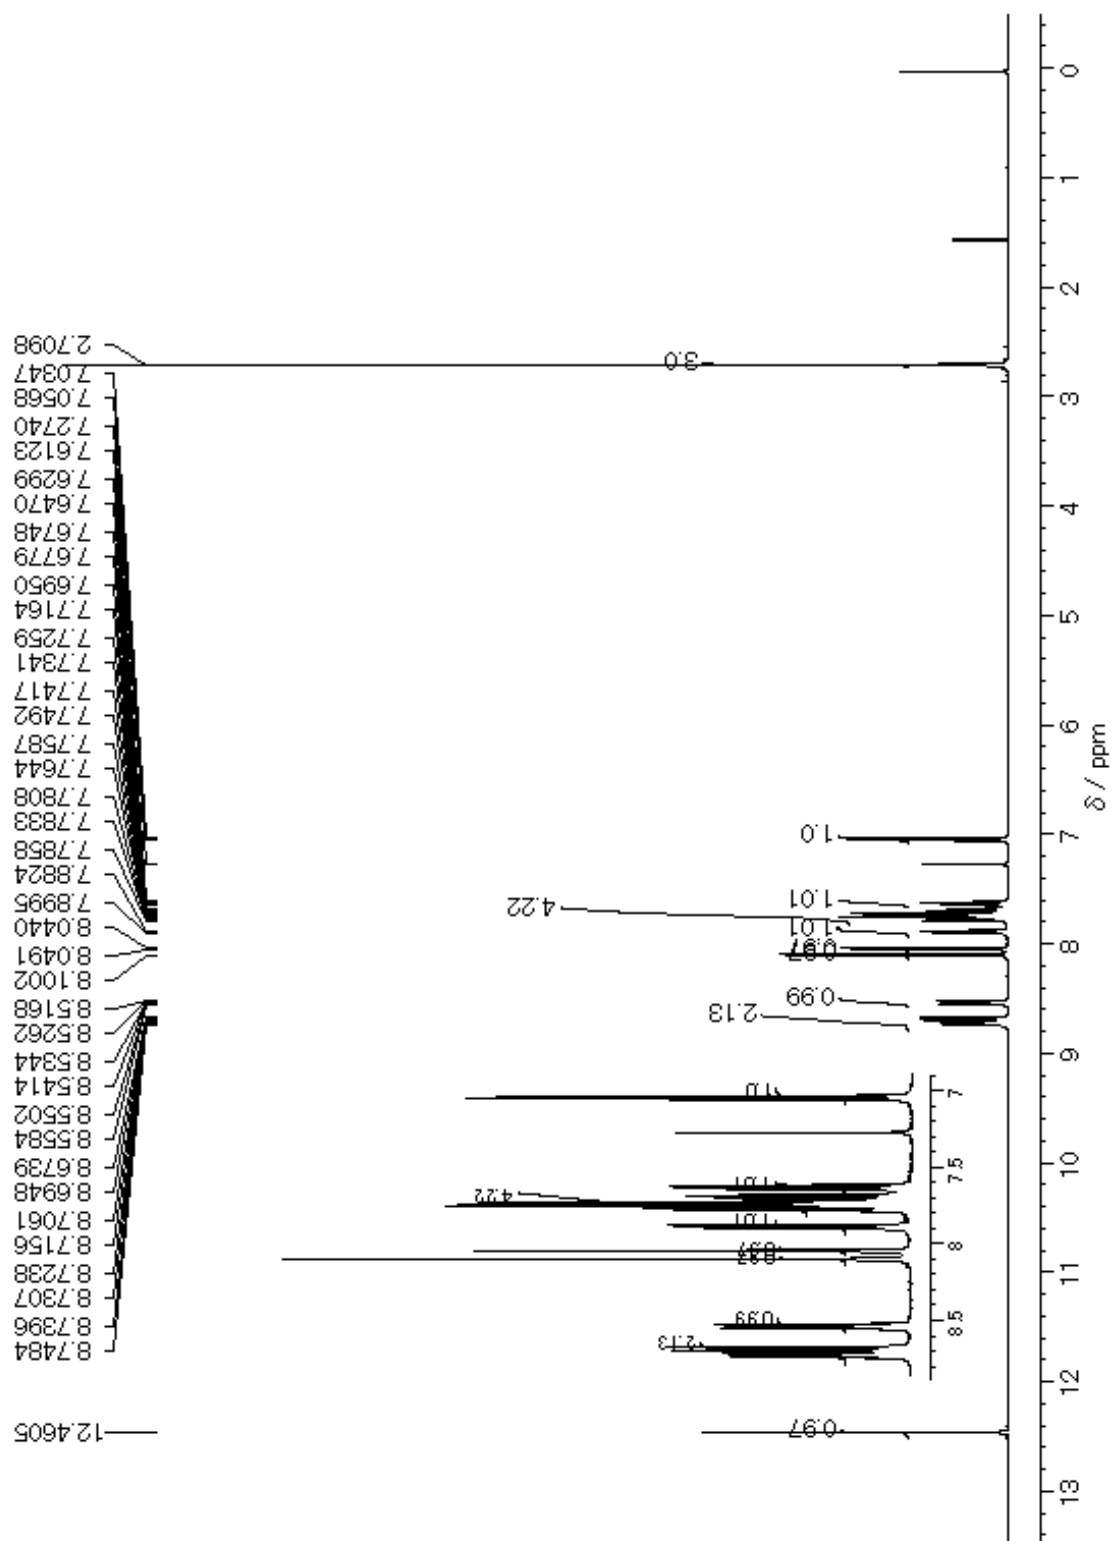



<sup>13</sup>C NMR of compound 8

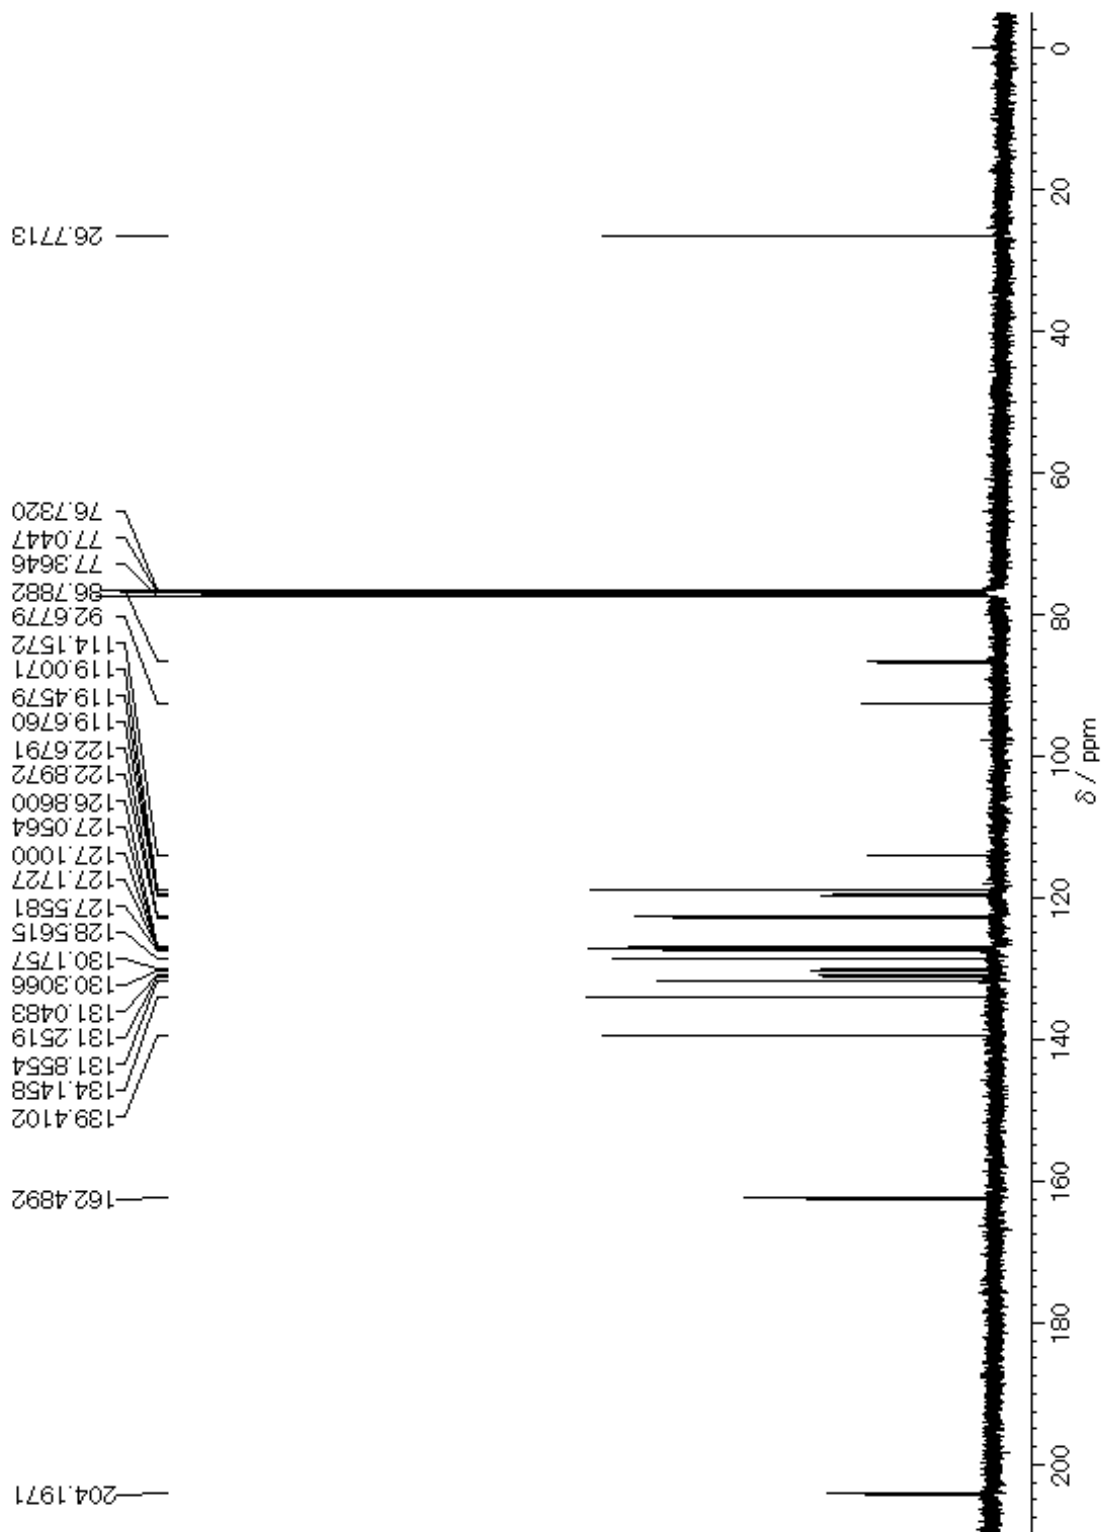

<sup>1</sup>H NMR of compound 9

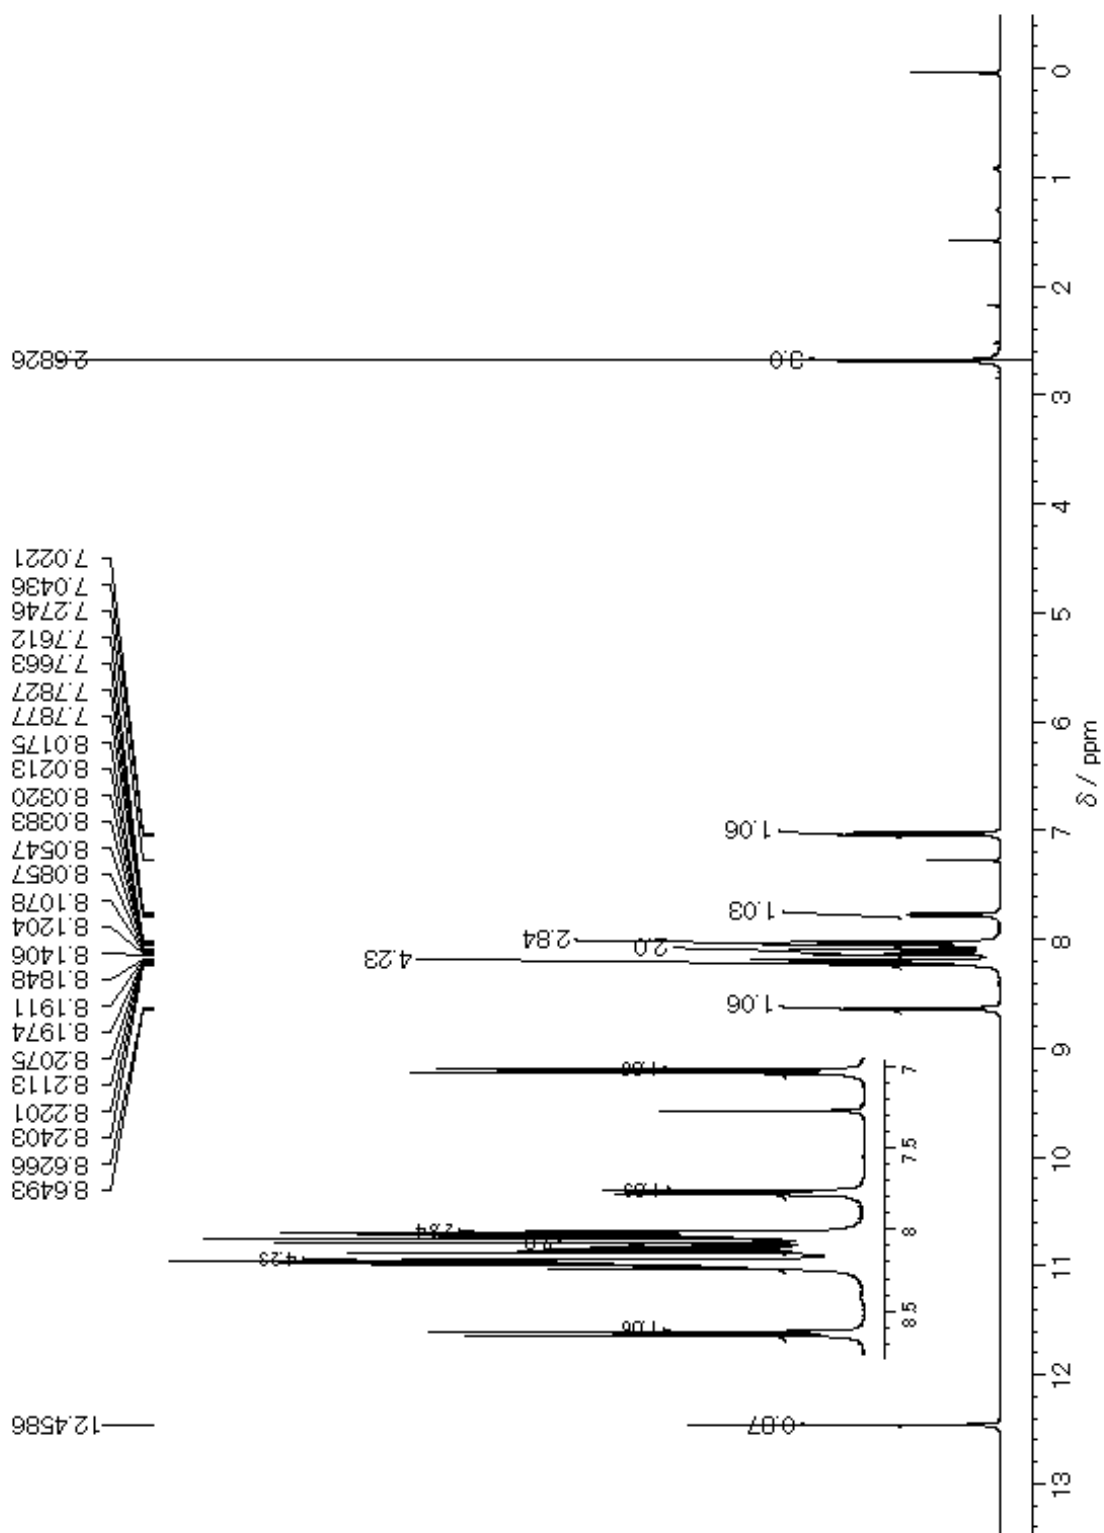

$^{13}\text{C}$  NMR of compound **9**

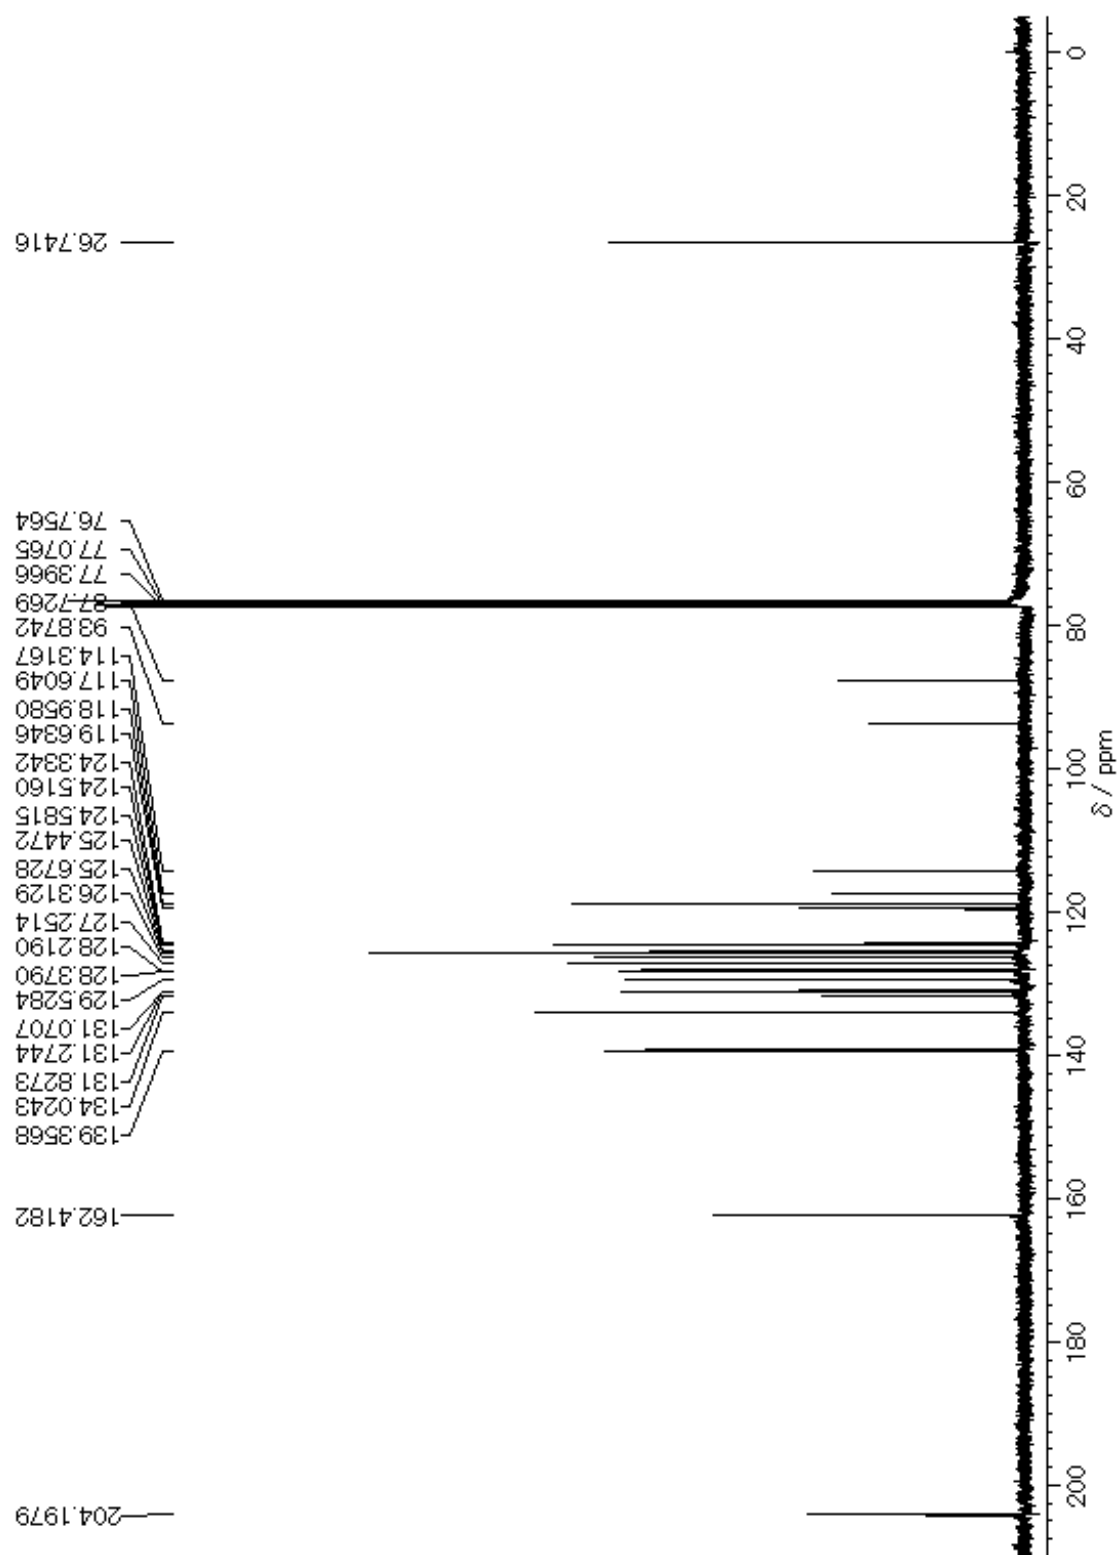

<sup>1</sup>H NMR of compound **10**

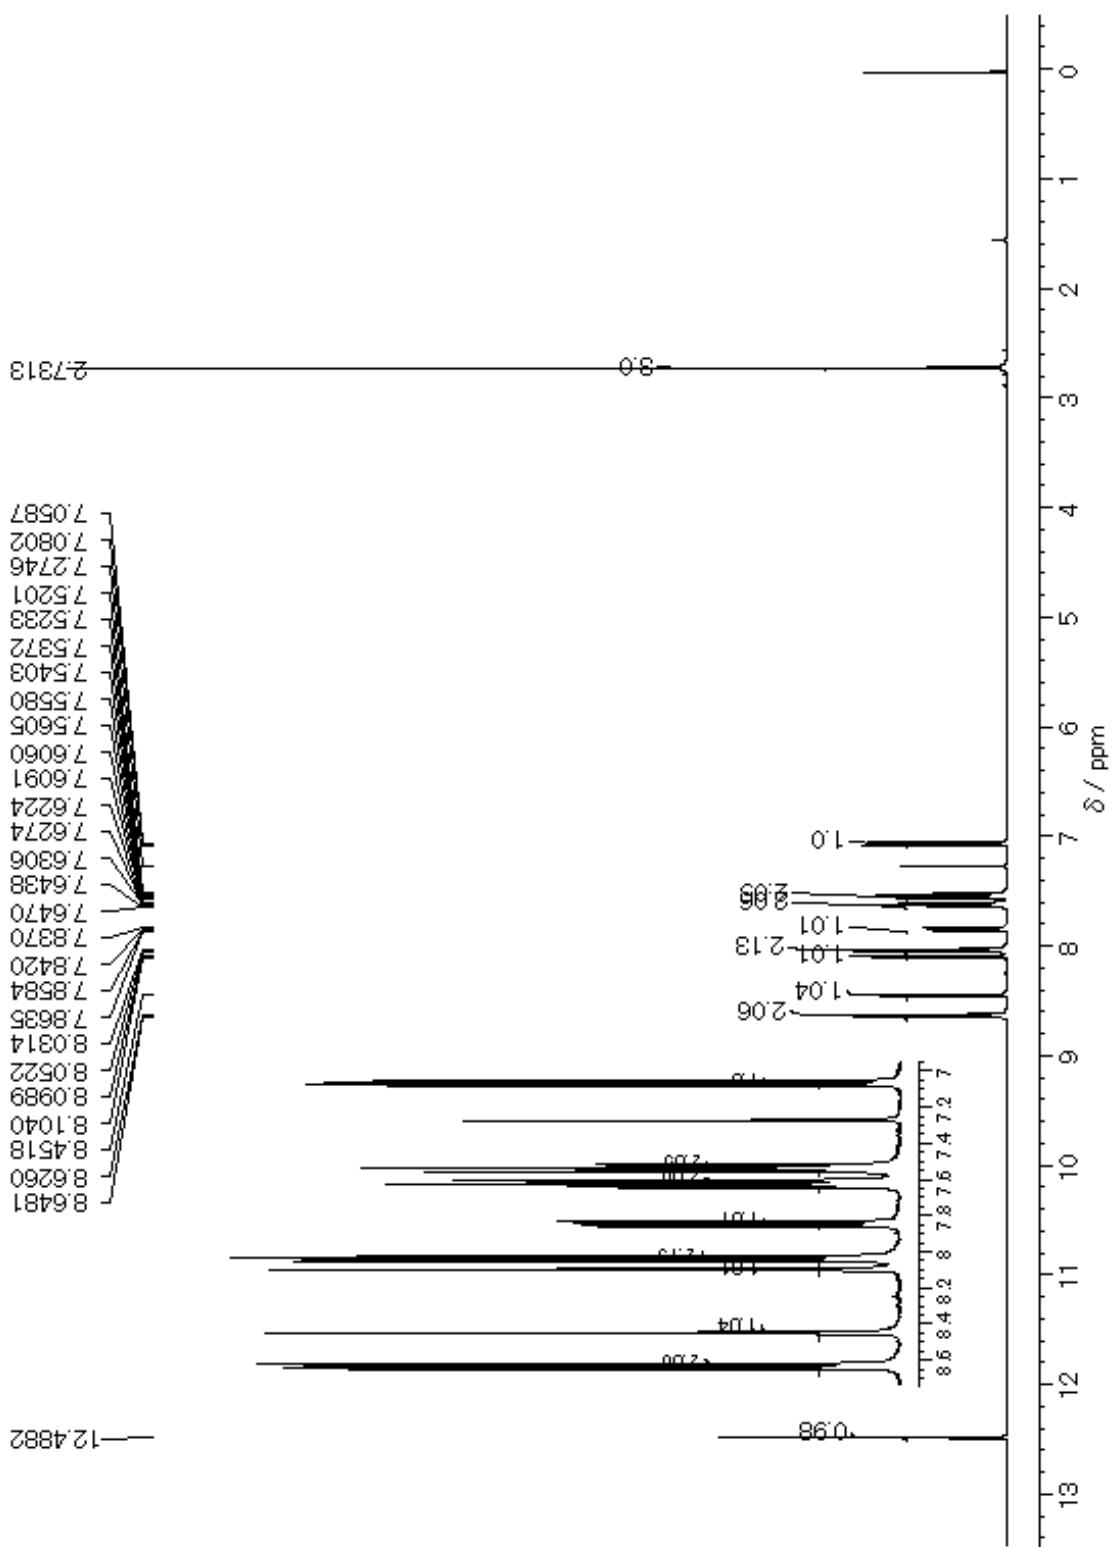

$^{13}\text{C}$  NMR of compound **10**

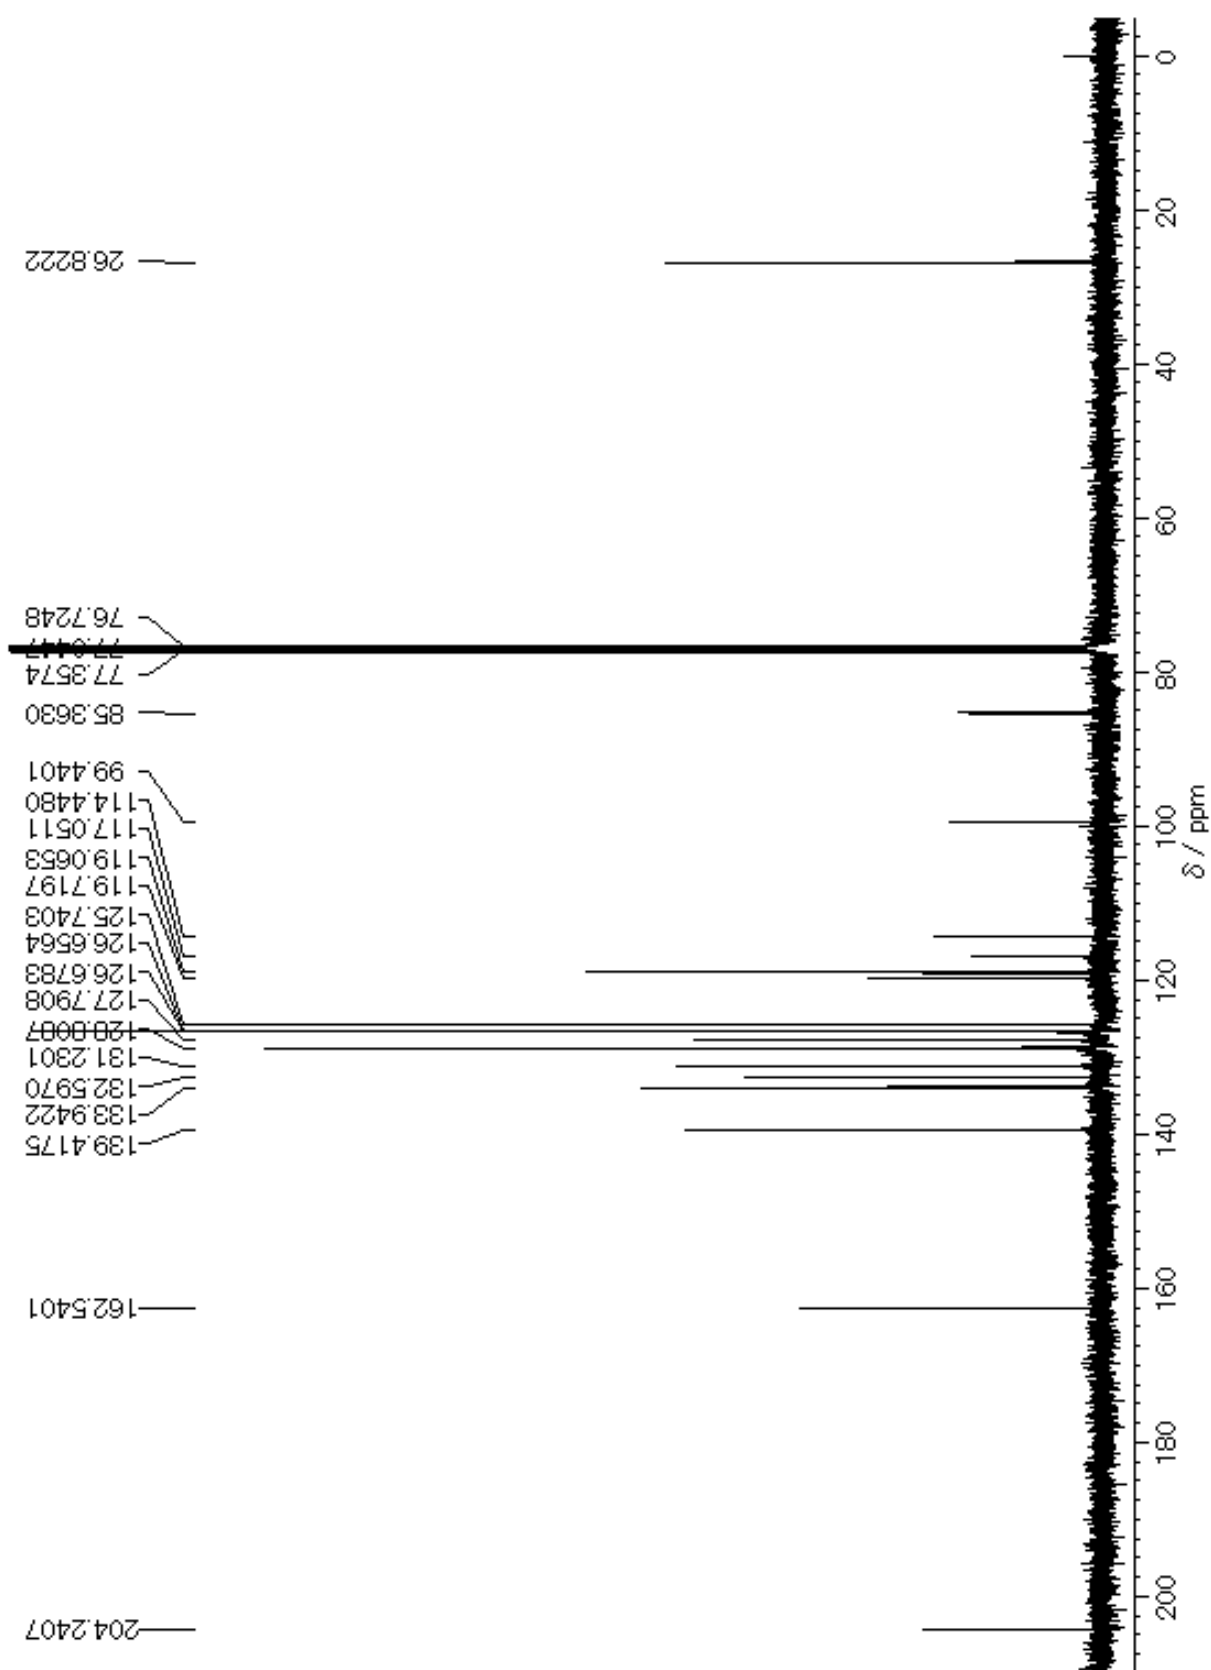

Supplement: c5pp00088b1.pdf [file c5pp00088b1.pdf]
